# Supplementary material for: Gemcitabine, Docetaxel, Capecitabine, Cisplatin, Irinotecan as First-line Treatment for Metastatic Pancreatic Cancer
Source: PubMed Central journal article supplement (PMC10461640; doi:10.1158/2767-9764.crc-23-0230), 2023-08-28
Supplement: crc-23-0230-s01.pdf [file crc-23-0230-s01.pdf]

**Supplementary Table 1: Representativeness of Study Participants**

|                                              |                                                                                                                                                                                                                                                                                                                                         |
|----------------------------------------------|-----------------------------------------------------------------------------------------------------------------------------------------------------------------------------------------------------------------------------------------------------------------------------------------------------------------------------------------|
| Cancer type(s)/subtype(s)/stage(s)/condition | Pancreatic adenocarcinoma                                                                                                                                                                                                                                                                                                               |
| Considerations related to:                   |                                                                                                                                                                                                                                                                                                                                         |
| Sex                                          | There is a slight male predominance with an incidence of 1.3:1 (males: females).                                                                                                                                                                                                                                                        |
| Age                                          | Metastatic pancreatic ductal adenocarcinoma (mPDAC) is diagnosed at a median age of 70 years.                                                                                                                                                                                                                                           |
| Race/Ethnicity                               | In the United States, based upon the 2018 SEER data submission, the incidence of Black Americans is higher compared to White Americans. The incidence is 16.7 per 100,000 for Black males compared to 14.8 per 100,000 for White males. The incidence is 14.6 per 100,000 for Black women compared to 11.5 per 100,000 for White women. |
| Overall representativeness of this study     | The sex distribution in our study was reflective of the general population with a male: female incidence of 1.35. The median age was slightly lower at 64years. Our study did have a higher proportion of White Americans compare to Black Americans (8:1).                                                                             |
