# Supplementary material for: Gemcitabine, Docetaxel, Capecitabine, Cisplatin, Irinotecan as First-line Treatment for Metastatic Pancreatic Cancer
Source: PubMed Central journal article supplement (PMC10461640; doi:10.1158/2767-9764.crc-23-0230), 2023-08-28
Supplement: crc-23-0230-s02.pdf [file crc-23-0230-s02.pdf]

**Supplementary Table 2. Related Adverse Events in >10% of the Phase 2 Dose Expansion**

|                                                             | <b>Grade 1/2<br/>N</b> | <b>Grade 3/4<br/>N</b> | <b>Total N=30<br/>N (%)</b> |
|-------------------------------------------------------------|------------------------|------------------------|-----------------------------|
| <b>Blood and lymphatic system disorders</b>                 |                        |                        |                             |
| Anemia                                                      | 0                      | 18                     | 18 (60%)                    |
| <b>Gastrointestinal disorders</b>                           |                        |                        |                             |
| Anorexia                                                    | 7                      | 1                      | 8 (27%)                     |
| Abdominal pain                                              | 4                      | 0                      | 4 (13%)                     |
| Diarrhea                                                    | 20                     | 0                      | 20 (67%)                    |
| Dry mouth                                                   | 4                      | 0                      | 4 (13%)                     |
| Flatulence                                                  | 5                      | 0                      | 5 (17%)                     |
| Gastroesophageal reflux disease                             | 4                      | 0                      | 4 (13%)                     |
| Mucositis oral                                              | 8                      | 0                      | 8 (27%)                     |
| Nausea                                                      | 13                     | 1                      | 14 (47%)                    |
| Vomiting                                                    | 11                     | 2                      | 13 (43%)                    |
| <b>General disorders and administration site conditions</b> |                        |                        |                             |
| Edema                                                       | 7                      | 0                      | 7 (23%)                     |
| Fatigue                                                     | 16                     | 0                      | 16 (53%)                    |
| Fever                                                       | 6                      | 0                      | 6 (20%)                     |
| <b>Investigations</b>                                       |                        |                        |                             |
| Alanine aminotransferase increased                          | 0                      | 4                      | 4 (13%)                     |
| Creatinine, increased                                       | 8                      | 0                      | 8 (27%)                     |
| Lymphocyte count decreased                                  | 0                      | 12                     | 12 (40%)                    |
| Neutrophil count decreased                                  | 0                      | 18                     | 18 (60%)                    |
| Platelet count decreased                                    | 0                      | 11                     | 11 (37%)                    |
| Weight loss                                                 | 2                      | 1                      | 3 (10%)                     |
| White blood count decreased                                 | 0                      | 14                     | 14 (47%)                    |
| <b>Metabolism and nutrition disorders</b>                   |                        |                        |                             |
| Dehydration                                                 | 5                      | 0                      | 5 (17%)                     |
| Hypocalcemia                                                | 2                      | 1                      | 3 (10%)                     |
| Hypokalemia                                                 | 4                      | 3                      | 7 (23%)                     |
| Hypomagnesemia                                              | 17                     | 3                      | 20 (67%)                    |
| Hypophosphatemia                                            | 1                      | 4                      | 5 (17%)                     |
| <b>Musculoskeletal and connective tissue disorders</b>      |                        |                        |                             |
| Back pain                                                   | 3                      | 0                      | 3 (10%)                     |
| Generalized muscle weakness                                 | 3                      | 0                      | 3 (10%)                     |
| <b>Nervous system disorders</b>                             |                        |                        |                             |

|                                                        | <b>Grade 1/2<br/>N</b> | <b>Grade 3/4<br/>N</b> | <b>Total N=30<br/>N (%)</b> |
|--------------------------------------------------------|------------------------|------------------------|-----------------------------|
| Dizziness                                              | 5                      | 0                      | 5 (17%)                     |
| Dysgeusia                                              | 19                     | 0                      | 19 (63%)                    |
| Neuropathy                                             | 18                     | 0                      | 18 (60%)                    |
| <b>Renal and urinary disorders</b>                     |                        |                        |                             |
| Chronic kidney disease                                 | 1                      | 2                      | 3 (10%)                     |
| <b>Respiratory, thoracic and mediastinal disorders</b> |                        |                        |                             |
| Epistaxis                                              | 7                      | 0                      | 7 (23%)                     |
| Sore throat                                            | 3                      | 0                      | 3 (10%)                     |
| <b>Skin and subcutaneous tissue disorders</b>          |                        |                        |                             |
| Alopecia                                               | 14                     | 0                      | 14 (47%)                    |
| Erythema                                               | 3                      | 0                      | 3 (10%)                     |
| Rash                                                   | 8                      | 0                      | 8 (27%)                     |
| Skin hyperpigmentation                                 | 3                      | 0                      | 3 (10%)                     |
