# Supplementary material for: Gemcitabine, Docetaxel, Capecitabine, Cisplatin, Irinotecan as First-line Treatment for Metastatic Pancreatic Cancer
Source: PubMed Central journal article supplement (PMC10461640; doi:10.1158/2767-9764.crc-23-0230), 2023-08-28
Supplement: crc-23-0230-s03.pdf [file crc-23-0230-s03.pdf]

Supplementary Table 3. Patient Characteristics

| Phase | Dose Level    | ID  | On Study Age | Gender | Race  | Pancreas Cancer Site | Differentiation           | Liver Mets | Lung only | BRCA Mutation     | KRAS Mutation | Baseline ECOG | Baseline Ascites | Baseline CA19-9 | NLR  | OS (months) | OS Censor | Best response | Surgical Resection |
|-------|---------------|-----|--------------|--------|-------|----------------------|---------------------------|------------|-----------|-------------------|---------------|---------------|------------------|-----------------|------|-------------|-----------|---------------|--------------------|
| 1     | Dose level 1  | P11 | 63           | Female | White | Body/Tail            | Poorly differentiated     | Yes        | No        | UNK               | UNK           | 1             | No               | 11592           | 4.49 | 14.58726899 | 1         | PD            | No                 |
| 1     | Dose level 1  | P23 | 65           | Male   | White | Head/Neck/Uncinate   | Moderately differentiated | Yes        | No        | UNK               | UNK           | 1             | Yes              | >400000.0       | 7.15 | 0.722792608 | 1         | NE            | No                 |
| 1     | Dose level 1  | P36 | 67           | Female | White | Head/Neck/Uncinate   | Poorly differentiated     | Yes        | No        | UNK               | UNK           | 0             | No               | 605.1           | 5.92 | 4.960985626 | 1         | PR            | No                 |
| 1     | Dose level 1  | P38 | 72           | Female | White | Head/Neck/Uncinate   | Poorly differentiated     | Yes        | No        | UNK               | UNK           | 1             | No               | 2.1             | 3.13 | 8.37782341  | 1         | SD            | No                 |
| 1     | Dose level 1  | P39 | 73           | Male   | White | Body/Tail            | Poorly differentiated     | No         | No        | UNK               | p.G12R        | 1             | No               | 5133.5          | 2.60 | 25.79055441 | 1         | SD            | No                 |
| 1     | Dose level 1  | P47 | 47           | Female | White | Body/Tail            | Poorly differentiated     | Yes        | No        | UNK               | UNK           | 1             | Yes              | 2032.3          | 2.73 | 14.32435332 | 1         | PR            | No                 |
| 2     | Dose level 1a | P1  | 69           | Male   | White | Head/Neck/Uncinate   | Moderately differentiated | Yes        | No        | No                | p.G12R        | 0             | No               | 255             | 3.09 | 19.97535934 | 1         | PR            | Yes                |
| 2     | Dose level 1a | P10 | 65           | Female | White | Head/Neck/Uncinate   | Unknown                   | Yes        | No        | UNK               | UNK           | 1             | No               | 16439.5         | 2.56 | 5.848049281 | 1         | PD            | No                 |
| 2     | Dose level 1a | P12 | 67           | Female | White | Body/Tail            | Poorly differentiated     | No         | No        | No                | p.S61R        | 0             | No               | 41.8            | 2.79 | 21.60924602 | 1         | SD            | Yes                |
| 2     | Dose level 1a | P13 | 68           | Female | White | Head/Neck/Uncinate   | Moderately differentiated | Yes        | No        | No                | p.G12D        | 0             | No               | 352.8           | 2.15 | 33.08418891 | 0         | PR            | Yes                |
| 2     | Dose level 1a | P14 | 60           | Male   | White | Body/Tail            | Unknown                   | Yes        | No        | UNK               | p.G12V        | 0             | Yes              | 15225.8         | 4.83 | 8.377823409 | 1         | PR            | No                 |
| 2     | Dose level 1a | P15 | 72           | Male   | White | Head/Neck/Uncinate   | Moderately differentiated | Yes        | No        | No                | UNK           | 1             | No               | 32445.5         | 8.60 | 8.542094456 | 1         | PR            | No                 |
| 2     | Dose level 1a | P16 | 64           | Male   | White | Body/Tail            | Poorly differentiated     | Yes        | No        | No                | UNK           | 1             | Yes              | 13260.3         | 9.44 | 6.045174538 | 1         | SD            | No                 |
| 2     | Dose level 1a | P18 | 63           | Female | White | Head/Neck/Uncinate   | Poorly differentiated     | Yes        | No        | UNK               | UNK           | 1             | No               | 1448.1          | 6.02 | 8.936344969 | 1         | SD            | No                 |
| 2     | Dose level 1a | P19 | 67           | Female | Asian | Head/Neck/Uncinate   | Poorly differentiated     | Yes        | No        | No                | UNK           | 1             | No               | <1              | 3.26 | 45.17453799 | 0         | CR            | No                 |
| 2     | Dose level 1a | P2  | 69           | Male   | White | Body/Tail            | Poorly differentiated     | Yes        | No        | UNK               | UNK           | 1             | No               | 9.8             | 1.43 | 2.95687885  | 1         | PD            | No                 |
| 2     | Dose level 1a | P20 | 67           | Female | Black | Body/Tail            | Moderately differentiated | Yes        | No        | No                | p.G12D        | 1             | No               | 99.3            | 6.89 | 7.283634497 | 1         | SD            | No                 |
| 2     | Dose level 1a | P21 | 45           | Male   | White | Body/Tail            | Moderately differentiated | Yes        | No        | UNK               | p.G12D        | 0             | No               | 5882.1          | 3.83 | 11.17043121 | 1         | PR            | No                 |
| 2     | Dose level 1a | P22 | 68           | Male   | White | Body/Tail            | Moderately differentiated | Yes        | No        | No                | p.G12V        | 0             | No               | 317.6           | 3.91 | 29.79876797 | 0         | PR            | Yes                |
| 2     | Dose level 1a | P24 | 56           | Female | White | Body/Tail            | Poorly differentiated     | No         | No        | UNK               | UNK           | 1             | No               | 268.7           | 1.23 | 8.31211499  | 1         | PR            | No                 |
| 2     | Dose level 1a | P25 | 68           | Male   | Black | Body/Tail            | Poorly differentiated     | Yes        | No        | UNK               | UNK           | 1             | Yes              | <1              | 1.97 | 21.09240246 | 1         | SD            | No                 |
| 2     | Dose level 1a | P26 | 66           | Male   | White | Body/Tail            | Poorly differentiated     | Yes        | No        | BRCA2 (S174delT)  | UNK           | 1             | No               | 383.2           | 4.95 | 41.0340076  | 0         | PR            | Yes                |
| 2     | Dose level 1a | P27 | 48           | Male   | White | Body/Tail            | Moderately differentiated | Yes        | No        | UNK               | UNK           | 0             | No               | 18.9            | 5.46 | 5.650924025 | 1         | PD            | No                 |
| 2     | Dose level 1a | P28 | 58           | Male   | White | Body/Tail            | Moderately differentiated | No         | No        | No                | p.G12D        | 1             | Yes              | 103.3           | 2.44 | 13.9301848  | 1         | SD            | No                 |
| 2     | Dose level 1a | P29 | 71           | Male   | White | Head/Neck/Uncinate   | Poorly differentiated     | Yes        | No        | UNK               | UNK           | 1             | No               | <1              | 6.42 | 10.71047228 | 1         | PR            | No                 |
| 2     | Dose level 1a | P3  | 42           | Male   | White | Head/Neck/Uncinate   | Moderately differentiated | Yes        | No        | UNK               | UNK           | 0             | No               | 78.4            | 4.49 | 5.848049281 | 1         | PR            | No                 |
| 2     | Dose level 1a | P30 | 54           | Male   | White | Head/Neck/Uncinate   | Poorly differentiated     | Yes        | No        | UNK               | UNK           | 1             | No               | 629.6           | 3.15 | 8.969199179 | 1         | SD            | No                 |
| 2     | Dose level 1a | P32 | 50           | Female | White | Head/Neck/Uncinate   | Moderately differentiated | Yes        | No        | No                | UNK           | 0             | No               | 177.9           | 1.17 | 17.34702259 | 1         | PR            | No                 |
| 2     | Dose level 1a | P33 | 48           | Female | White | Head/Neck/Uncinate   | Poorly differentiated     | Yes        | No        | UNK               | p.G12V        | 1             | No               | 566.7           | 2.58 | 10.87474333 | 1         | SD            | No                 |
| 2     | Dose level 1a | P35 | 58           | Male   | White | Body/Tail            | Moderately differentiated | Yes        | No        | UNK               | UNK           | 1             | Yes              | 9986.3          | 3.92 | 16          | 1         | PR            | No                 |
| 2     | Dose level 1a | P40 | 66           | Male   | White | Head/Neck/Uncinate   | Poorly differentiated     | Yes        | No        | UNK               | UNK           | 1             | No               | 24902.7         | 3.73 | 2.36550308  | 1         | NE            | No                 |
| 2     | Dose level 1a | P41 | 52           | Male   | White | Body/Tail            | Poorly differentiated     | No         | No        | No                | p.G12R        | 1             | Yes              | 203.5           | 3.58 | 36.13963039 | 0         | PR            | Yes                |
| 2     | Dose level 1a | P43 | 74           | Male   | White | Head/Neck/Uncinate   | Moderately differentiated | Yes        | No        | UNK               | UNK           | 1             | No               | 7805.3          | 3.33 | 40.14784394 | 0         | PR            | No                 |
| 2     | Dose level 1a | P44 | 50           | Female | White | Head/Neck/Uncinate   | Unknown                   | Yes        | No        | UNK               | p.G12V        | 0             | Yes              | 21,831.60       | 6.12 | 5.519507187 | 1         | SD            | No                 |
| 2     | Dose level 1a | P45 | 69           | Male   | Black | Body/Tail            | Moderately differentiated | No         | No        | UNK               | UNK           | 0             | No               | 593.9           | 3.82 | 12.74745326 | 1         | PR            | No                 |
| 2     | Dose level 1a | P6  | 58           | Female | White | Body/Tail            | Poorly differentiated     | Yes        | No        | No                | UNK           | 1             | No               | 7059.1          | 2.57 | 35.31827515 | 1         | CR            | No                 |
| 1     | Dose level 1b | P34 | 60           | Male   | White | Body/Tail            | Poorly differentiated     | Yes        | No        | No                | UNK           | 1             | No               | 29786.4         | 5.96 | 17.60985626 | 1         | PR            | No                 |
| 1     | Dose level 1b | P37 | 71           | Male   | White | Head/Neck/Uncinate   | Moderately differentiated | Yes        | No        | UNK               | UNK           | 1             | Yes              | 39129.5         | 5.15 | 8.344969199 | 1         | PR            | No                 |
| 1     | Dose level 1b | P5  | 37           | Female | White | Body/Tail            | Poorly differentiated     | Yes        | No        | No                | p.G12D        | 1             | Yes              | 2005.6          | 4.17 | 21.81519507 | 1         | PR            | No                 |
| 1     | Dose level 2  | P17 | 63           | Male   | Black | Head/Neck/Uncinate   | Poorly differentiated     | Yes        | No        | UNK               | UNK           | 0             | No               | 97.2            | 2.27 | 21.84804928 | 1         | NE            | No                 |
| 1     | Dose level 2  | P46 | 52           | Male   | Asian | Head/Neck/Uncinate   | Moderately differentiated | Yes        | No        | UNK               | UNK           | 1             | No               | 3222.2          | 3.78 | 8.706355503 | 1         | SD            | No                 |
| 1     | Dose level 2  | P7  | 55           | Female | White | Head/Neck/Uncinate   | Poorly differentiated     | Yes        | No        | UNK               | UNK           | 1             | No               | 1652.9          | 4.38 | 5.519507187 | 1         | PD            | No                 |
| 1     | Dose level 2  | P8  | 61           | Male   | White | Body/Tail            | Poorly differentiated     | Yes        | No        | UNK               | UNK           | 0             | No               | 925.3           | 2.84 | 5.9137577   | 1         | SD            | No                 |
| 1     | Dose Level 3  | P31 | 64           | Female | Black | Head/Neck/Uncinate   | Poorly differentiated     | Yes        | No        | UNK               | UNK           | 1             | No               | 82.3            | 3.50 | 10.05338809 | 1         | PR            | No                 |
| 1     | Dose Level 3  | P4  | 68           | Female | White | Body/Tail            | Unknown                   | Yes        | No        | UNK               | UNK           | 1             | No               | 1532.3          | 3.63 | 6.63650308  | 1         | SD            | No                 |
| 1     | Dose level 3  | P42 | 53           | Female | White | Body/Tail            | Poorly differentiated     | Yes        | No        | UNK               | UNK           | 0             | No               | 2.1             | 4.81 | 9.954825462 | 1         | PR            | No                 |
| 1     | Dose Level 3  | P9  | 70           | Male   | White | Body/Tail            | Moderately differentiated | Yes        | No        | BRCA1 (p.Glu143*) | UNK           | 1             | No               | 8.1             | 4.03 | 21.12525667 | 1         | PR            | No                 |
