# Supplementary material for: Gemcitabine, Docetaxel, Capecitabine, Cisplatin, Irinotecan as First-line Treatment for Metastatic Pancreatic Cancer
Source: PubMed Central journal article supplement (PMC10461640; doi:10.1158/2767-9764.crc-23-0230), 2023-08-28
Supplement: crc-23-0230-s04.pdf [file crc-23-0230-s04.pdf]

## CONSORT 2010 Flow Diagram

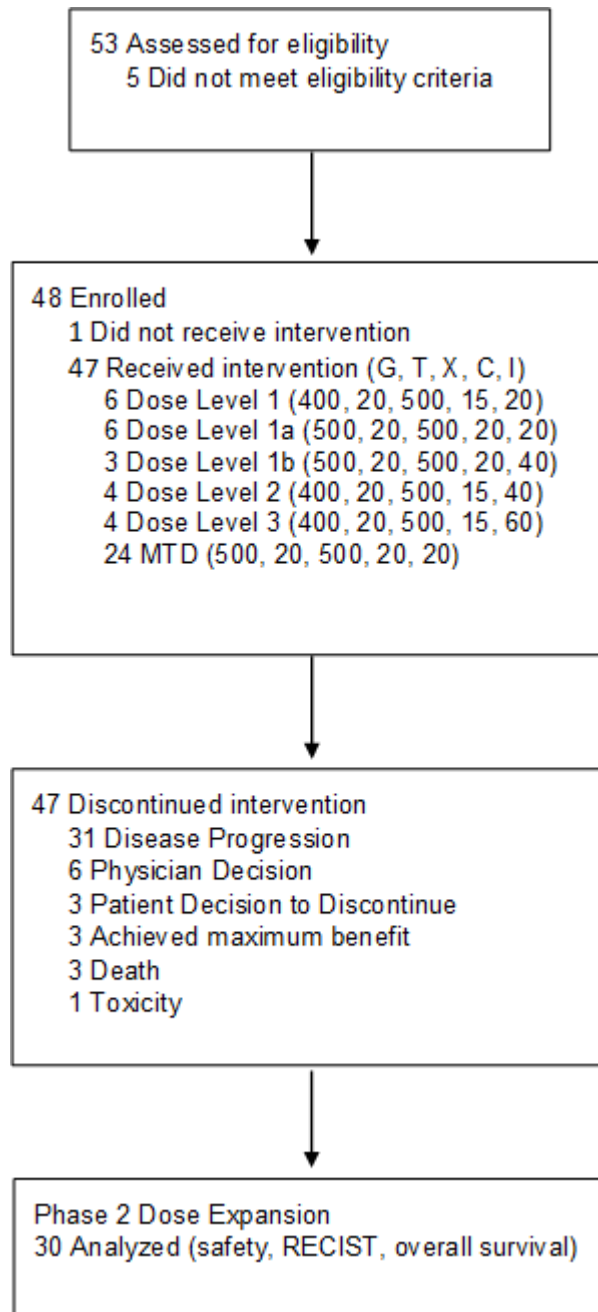

Supplementary Figure 1. CONSORT Diagram
