# Supplementary material for: Gemcitabine, Docetaxel, Capecitabine, Cisplatin, Irinotecan as First-line Treatment for Metastatic Pancreatic Cancer
Source: PubMed Central journal article supplement (PMC10461640; doi:10.1158/2767-9764.crc-23-0230), 2023-08-28
Supplement: crc-23-0230-s05.pdf [file crc-23-0230-s05.pdf]

### A. Overall Survival by Differentiation Status

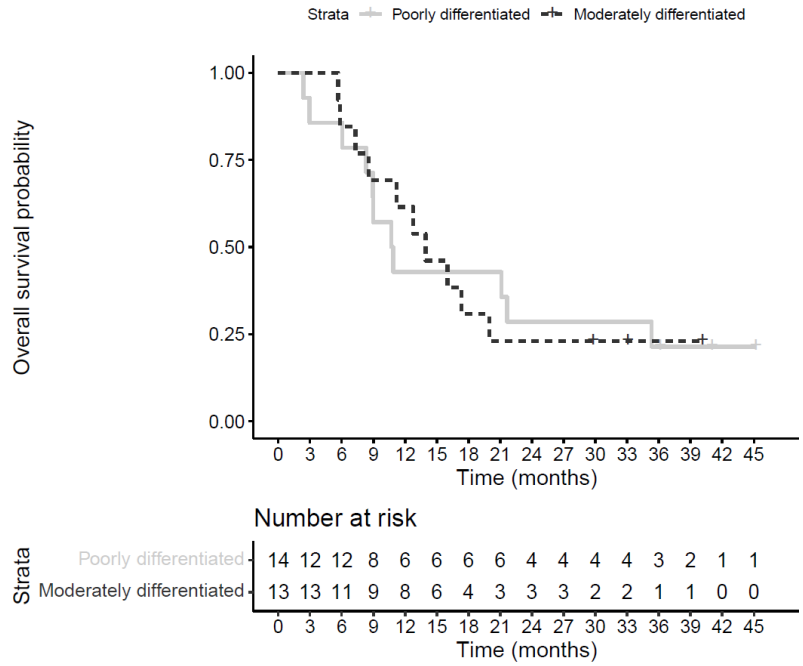

### B. Progression-Free Survival by Differentiation Status

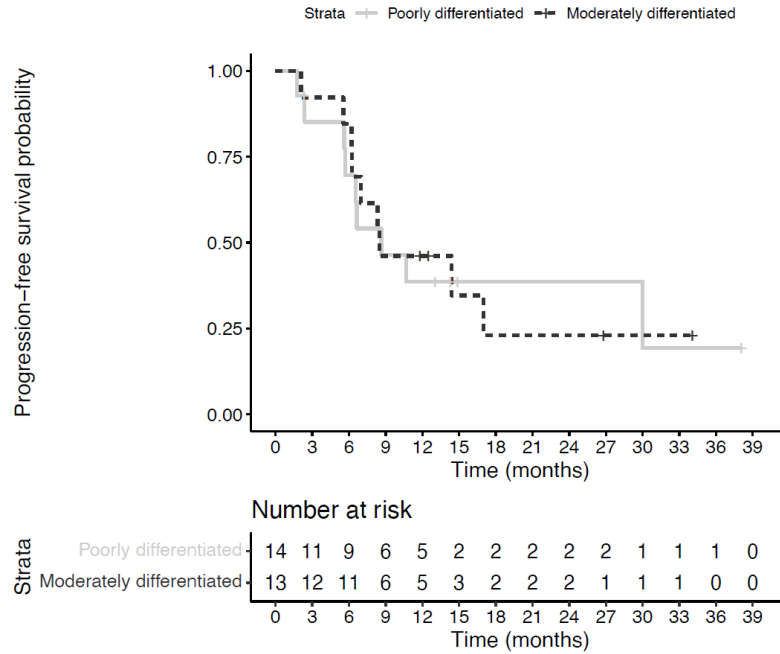

**Supplementary Figure 2. Kaplan-Meier Estimates of Overall Survival and Progression-Free Survival in the Expansion Cohort by Differentiation Status.** Panel A shows overall survival; the median was 13.9 and 10.8 months for well to moderately differentiated tumors and poorly differentiated tumors, respectively. Panel B shows progression-free survival; the median was 8.5 and 8.6 months for well to moderately differentiated tumors and poorly differentiated tumors, respectively.
